# Supplementary material for: Acute perimyocarditis with cardiac tamponade in COVID-19 infection without respiratory disease
Source: PubMed Central journal article supplement — BMJ Case Rep. 2020 Aug 19;13(8):e236218. doi: 10.1136/bcr-2020-236218 (PMC7440216; doi:10.1136/bcr-2020-236218), 2020-08-19
Supplement: bcr-2020-236218supp001.pdf [file bcr-2020-236218supp001.pdf]

**Supplementary Table 1.** Overview of the most important laboratory findings during patient's stay.

|                                        | <i>References</i>   | <b>Day 7<sup>#</sup></b> | <b>Day 8</b> | <b>Day 9</b> | <b>Day 10</b> | <b>Day 11</b> | <b>Day 12</b> | <b>Day 13</b> | <b>Day 14</b> | <b>Day 15<sup>†</sup></b> |
|----------------------------------------|---------------------|--------------------------|--------------|--------------|---------------|---------------|---------------|---------------|---------------|---------------------------|
| B-hemoglobin, g/dL                     | <i>11.7 to 15.3</i> | 17.0                     | 16           | 16.2         | 16.3          | 14.1          | 12.5          | 11.2          | 10.7          |                           |
| B-leucocytes, 10 <sup>9</sup> /L       | <i>4.1 to 9.8</i>   | 13.2                     | 10.1         | 13.0         | 17.0          | 11.2          | 8.1           | 7             | 7             | 7.5                       |
| B-trombocytes, 10 <sup>9</sup> /L      | <i>164 to 370</i>   | 188                      | 196          | 202          | 214           | 170           | 155 L         | 165           | 171           | 182                       |
| P-PT-INR                               | <i>0.8 to 1.2</i>   |                          | 1.2          | 1.1          | 1.2           | 1.3           | 1.3           | 1.2           | 1.2           | 1.2                       |
| P-troponin T, ng/L                     | <i>≤14</i>          | 108                      | 94           | 116          | 198           | 186           | 183           | 155           | 81            |                           |
| PS-NT-proBNP, ng/L                     | <i>&lt;287</i>      | 1025                     |              |              |               | 2038          |               |               |               |                           |
| a-Lactate*, mmol/L                     |                     | 2.7                      | 2.7 to 4.1   | 3.1 to 4.0   | 1.8 to 2.7    | 0.8 to 2.3    | 0.8 to 1.1    | 0.5 to 1.6    | 0.5 to 1.8    |                           |
| P-phosphate, mmol/L                    | <i>0.76 to 1.41</i> |                          | 1.18         | 1.42         | 1.13          | 0.9           | 0.93          | 1.18          | 1.34          | 1.21                      |
| PS-magnesium, mmol/L                   | <i>0.71 to 0.94</i> |                          | 0.85         | 0.91         | 0.85          | 0.81          | 0.81          | 0.72          | 0.66 L        | 0.73                      |
| PS-urea, mmol/L                        | <i>3.1 to 7.9</i>   |                          | 6.1          | 7.9          | 7             | 7.3           | 6.2           | 6.8           | 5.8           | 4.3                       |
| PS-creatinine, μmol/L                  | <i>45 to 90</i>     | 58                       | 58           | 63           | 54            | 53            | 48            | 53            | 49            | 50                        |
| Pt-est. GFR, mL/min/1,73m <sup>2</sup> | <i>≥60</i>          | >90                      | >90          | >90          | >90           | >90           | >90           | >90           | >90           | >90                       |
| P-potassium                            | <i>3.5 to 4.4</i>   | 3.8                      | 4.4          | 4.3          | 4             | 3.7           | 4.2           | 3.6           | 3.3-3.8       |                           |
| PS-sodium                              | <i>137 to 145</i>   | 137                      | 130          | 129          | 129           | 128           | 134           | 137           | 135           |                           |
| PS-C-reactive protein, mg/L            | <i>&lt;5</i>        | 11                       | 9            | 17           | 54            | 89            | 31            | 24            | 21            | 19                        |
| PS-albumin, g/L                        | <i>36 to 45</i>     |                          | 28 L         | 26 L         | 23 L          | 20 L          | 23 L          | 22 L          | 24 L          | 27 L                      |
| P-glucose, mmol/L                      | <i>4.2 to 6.3</i>   | 7.4                      |              |              |               |               |               |               |               |                           |
| PS-ALAT, U/L                           | <i>10 to 45</i>     | 19                       | 14           | 22           | 46            | 24            | 20            | 50            | 117           | 178                       |
| PS-ALP, U/L                            | <i>35 to 105</i>    |                          | 56           | 55           | 64            | 49            | 36            | 41            | 53            | 60                        |
| PS-amylase, total, U/L                 | <i>25 to 120</i>    |                          | 32           | 30           | 20 L          | 24 L          | 25            | 31            | 36            | 39                        |
| PS-bilirubin, total, μmol/L            | <i>5 to 25</i>      |                          | 6            | 7            | 13            | 6             | 9             | 7             | 8             | 8                         |

Day 9; pericardial drainage was performed. Urine analyses; low sodium (<10 to 16 mmol/L), low normal potassium (13 to 34 mmol/L). Osmolality was 356 to 854 mosm/kg.

Initially elevated albumine level (194 mg/L). No growth in urine cultures. Pericardial fluid analyses; leucocytes 0.012 x 10<sup>9</sup>/L, protein 30 g/L, polymerase chain reaction negative for coronavirus SARS-CoV-2, influenza A/B, enterovirus, adenovirus, C. pneumoniae, M. pneumonia, B. pertussis, HHV6, CMV. No growth.

\*Minimum to maximum for the given day. #Admittance to hospital. †Discharge from intensive care unit. Abbreviations: B, blood; P, plasma; a, arterial; ALAT, alanine aminotransferase; ALP, alkaline phosphatase; est., estimated.

**Supplementary Table 2.** Overview of fluid support, pressor support and accumulated fluid load during patient's stay in intensive care unit

|                             | Day 7 <sup>#</sup> | Day 8 | Day 9     | Day 10 | Day 11 | Day 12 | Day 13 | Day 14 | Day 15 <sup>†</sup> |
|-----------------------------|--------------------|-------|-----------|--------|--------|--------|--------|--------|---------------------|
| iv. fluid support           | 3000               | 3900  | 100       |        | 861    | 500    |        |        |                     |
| po. fluid                   | 70                 | 2275  | 2050      | 2785   | 1700   | 1250   | 930    | 1375   | 400                 |
| iv. norepinephrine          | - X -              | - X - | - X -     | - X -  | - X -  |        |        |        |                     |
| iv. dobutamine              |                    | - X - | - X -     | - X -  |        |        |        |        |                     |
| Diuresis, ml                | 97                 | 505   | 1466      | 750    | 1858   | 820    | 2860   | 3665   | 1670                |
| Perspiration, ml            | 0                  | 870   | 820       | 1110   | 600    | 900    | 780    | 320    | 800                 |
| *Pericardial drainage, ml   |                    |       | 300 + 100 | 55     |        |        |        |        |                     |
| Total fluid in, ml          | 3070               | 6252  | 6241      | 4486   | 2592   | 1980   | 930    | 1375   | 400                 |
| Total fluid out, ml         | 97                 | 1375  | 2286      | 2315   | 2508   | 1820   | 3840   | 4235   | 2620                |
| Cumulative net fluid in, ml | 2973               | 7850  | 11805     | 14051  | 14135  | 14295  | 11385  | 8525   | 6345                |

Day 9; pericardial drainage was performed. \*Immediate drainage of 300 ml, subsequently drainage of in total 155 ml. #Admittance to hospital.

†Discharge from intensive care unit. Abbreviations: iv, intravenously; po, per orally, ml; millilitre; - X -, administered.
