# Supplementary material for: Acute perimyocarditis with cardiac tamponade in COVID-19 infection without respiratory disease
Source: PubMed Central journal article supplement — BMJ Case Rep. 2020 Aug 19;13(8):e236218. doi: 10.1136/bcr-2020-236218 (PMC7440216; doi:10.1136/bcr-2020-236218), 2020-08-19
Supplement: bcr-2020-236218supp002.pdf [file bcr-2020-236218supp002.pdf]

## Supplementary figures

**Page 1:** Supplementary Figure 1. X-ray of patient at admission (day 7).

**Page 2:** Supplementary Figure 2. X-ray of patient at day 11.

### Supplementary Figure 1. Chest X-ray of patient at admission (day 7).

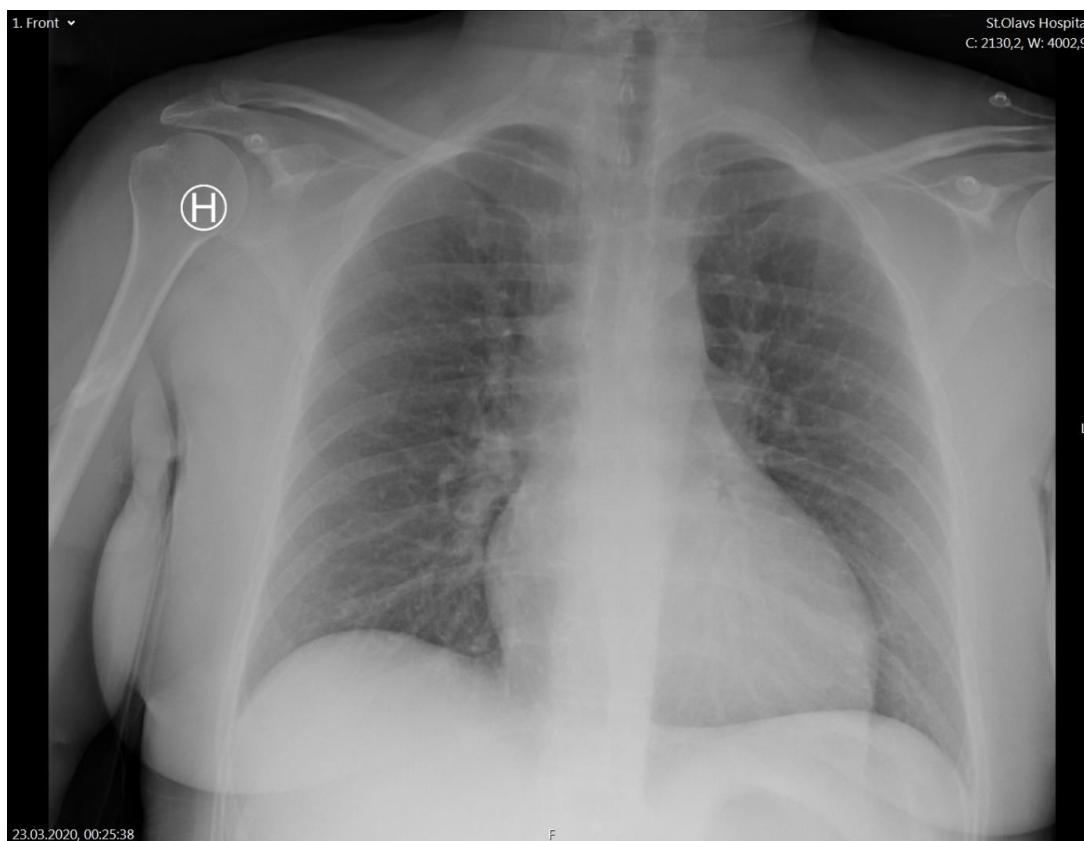

Chest X-ray at admission with no pulmonary involvement.

**Supplementary Figure 2. Chest X-ray of patient at day 11.**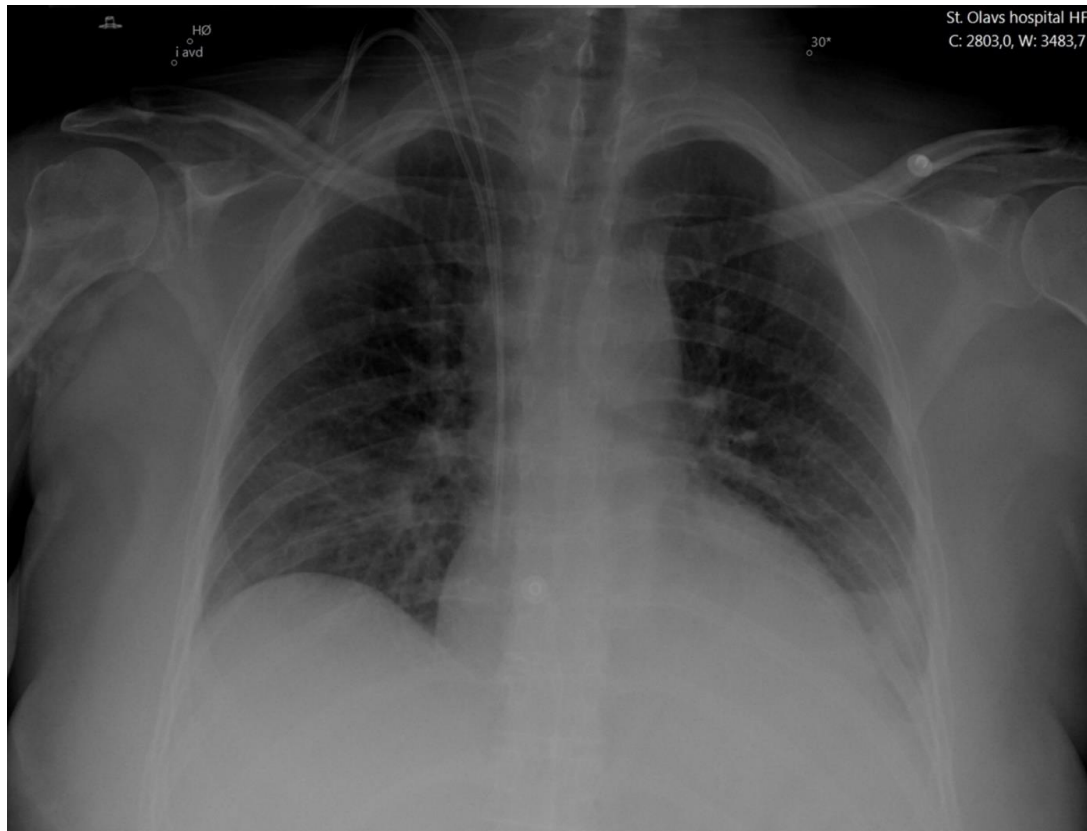

Chest x-ray at the intensive care unit showing minor amounts of bilateral pleural effusion and basal atelectasis in the left lung.
